# Supplementary material
Source: publisher figshare collection journal article supplement (https://gsajournals.figshare.com/articles/dataset/_/6262214)
Supplement: Supplementary file 1 [file 1]

## Sheet: Table S1
Table S1. Late blight clonal lineages detected throughout seven years at the Michigan State University Clarksville Research Center (Clarksville, MI).
		Year	Clonal lineage
		2010	US-22
		2011	US-22
		2012	US-22
		2013	US-23
		2014	US-23
		2015	US-23
		2017	US-23

## Sheet: Table S2
Table S2. Variance components estimates (posterior standard deviation) derived from BRR model for late blight and common scab resistance by model. Phenotypic scores were standardized to unit variance; hence estimates can be interpreted as the proportion of variance explained by each component.
Model #	Year	Genetic						Genotype-by-year g	Error
(label)a		Genotype	Marker-derived				Total genetic f
			PC b	Additivec	Dominanced	Generale
Late blight
M1	0.266 (0.021)								0.735 (0.025)
M2	0.257 (0.014)	0.434 (0.018)					0.434 (0.018)		0.303 (0.011)
M3	0.249 (0.028)	0.340 (0.031)					0.340 (0.031)	0.253 (0.019)	0.144 (0.006)
M4	0.247 (0.026)	0.266 (0.029)	0.097 (0.025)				0.353 (0.033)	0.250 (0.018)	0.144 (0.006)
M5 (A)	0.238 (0.028)		0.139 (0.069)	0.270 (0.046)			0.314 (0.036)	0.285 (0.022)	0.144 (0.006)
M6 (A+D)	0.242 (0.027)		0.132 (0.060)	0.162 (0.061)	0.13 (0.045)		0.329 (0.035)	0.272 (0.020)	0.144 (0.006)
M7 (G)	0.245 (0.027)		0.105 (0.038)			0.271 (0.033)	0.346 (0.033)	0.253 (0.019)	0.144 (0.006)
Common Scab
M1	0.033 (0.006)								0.971 (0.022)
M2	0.030 (0.004)	0.456 (0.017)					0.456 (0.017)		0.523 (0.012)
M3	0.029 (0.005)	0.440 (0.020)					0.440 (0.020)	0.060 (0.008)	0.483 (0.013)
M4	0.029 (0.005)	0.419 (0.021)	0.030 (0.012)				0.447 (0.023)	0.056 (0.009)	0.485 (0.012)
M5 (A)	0.032 (0.006)		0.117 (0.076)	0.499 (0.070)			0.443 (0.025)	0.061 (0.009)	0.485 (0.013)
M6 (A+D)	0.031 (0.006)		0.079 (0.052)	0.278 (0.085)	0.205 (0.073)		0.445 (0.025)	0.057 (0.009)	0.486 (0.013)
M7 (G)	0.031 (0.006)		0.054 (0.031)			0.441 (0.031)	0.448 (0.023)	0.056 (0.009)	0.485 (0.013)
a M1-M7 are model numbers (label). The effects included in each of them are described in the columns. b Principal components, c linear regression on allele content (0/1/2/3/4), d Simple dominance (1 degree of freedom per locus representing heterozygous) and e General model for additive + dominance (with up to 4 degrees of freedom per locus). f Total genetic variance, g Genotype-by-year interactio…

## Sheet: Table S3
Table S3. Top ten ranked loci from the whole genome regression derived from BayesB model, according to their additive variance estimates for late blight.
Locus	Chromosome	Proportion of variance explained (Prob.)*	Putative function
solcap_snp_c2_23056	V	0.00441	60S ribosomal protein L34
		(0.669)
solcap_snp_c1_11991	X	0.00227	Pre-mRNA-splicing factor syf2
		(0.596)
solcap_snp_c2_20640	IX	0.00264	Ammonium transporter 1 member 1
		(0.590)
solcap_snp_c2_27764	IX	0.00262	Sucrose synthase
		(0.578)
solcap_snp_c2_50301	V	0.00143	Gene of unknown function
		(0.490)
solcap_snp_c2_33537	V	0.00121	6-phosphogluconate dehydrogenase, decarboxylating
		(0.475)
solcap_snp_c2_54368	V	0.00109	Chalcone synthase
		(0.467)
solcap_snp_c2_23829	V	0.00098	Dihydropterin pyrophosphokinase-dihydropteroate synthase
		(0.427)
solcap_snp_c2_14946	XI	0.00083	Xanthine dehydrogenase
		(0.449)
solcap_snp_c1_4444	III	0.00066	HCF106; proton motive force dependent protein transmembrane transporter
		(0.409)
* Estimated posterior probability of having a SNP variance greater than zero given the data.

## Sheet: Table S4
Table S4. Top ten ranked loci from the whole genome regression derived from BayesB model, according to their additive variance estimates for common scab.
Locus	Chromosome	Proportion of variance explained (Prob.)*	Putative function
solcap_snp_c2_54867	IX	0.0306	WRKY transcription factor
		(0.977)
solcap_snp_c2_42312	III	0.0019	Fructokinase
		(0.695)
solcap_snp_c1_8133	VI	0.0018	TAF5
		(0.766)
solcap_snp_c1_15485	VII	0.0015	Conserved gene of unknown function
		(0.690)
solcap_snp_c2_45522	V	0.0014	DEAD-box ATP-dependent RNA helicase 22
		(0.698)
solcap_snp_c2_52104	VII	0.0011	Auxin response factor
		(0.678)
solcap_snp_c1_2519	I	0.001	Leucine-rich repeat-containing protein
		(0.699)
solcap_snp_c2_22003	IX	0.001	Homocysteine s-methyltransferase
		(0.683)
solcap_snp_c2_6185	XI	0.0009	Dead box ATP-dependent RNA helicase
		(0.643)
solcap_snp_c2_34103	VIII	0.0007	Conserved gene of unknown function
		(0.631)
* Estimated posterior probability of having a SNP variance greater than zero given the data.

## Sheet: Table S5
Table S5. Year cross-validation correlations obtained with BRR model by trait and model.
	Year	Model # (label) a
		M2	M3	M5 (A)	M6 (A+D)	M7 (G)
	Late blight
	2010	0.551	0.531	0.456	0.463	0.518
	2011	0.651	0.661	0.605	0.612	0.643
	2012	0.583	0.611	0.574	0.581	0.614
	2013	0.424	0.419	0.482	0.492	0.49
	2014	0.621	0.597	0.634	0.654	0.647
	2015	0.72	0.724	0.683	0.692	0.735
	2017	0.509	0.504	0.467	0.491	0.499
	Average	0.58	0.578	0.557	0.569	0.592
	SD	0.097	0.102	0.09	0.089	0.092
	Common scab
	2009	0.458	0.461	0.469	0.471	0.466
	2010	0.52	0.521	0.534	0.534	0.519
	2011	0.61	0.613	0.627	0.628	0.618
	2012	0.625	0.629	0.626	0.626	0.634
	2013	0.751	0.758	0.734	0.736	0.75
	2014	0.615	0.612	0.63	0.634	0.636
	2015	0.649	0.654	0.67	0.672	0.66
	2016	0.639	0.639	0.65	0.646	0.647
	2017	0.507	0.51	0.517	0.518	0.514
	Average	0.597	0.6	0.606	0.607	0.605
	SD	0.088	0.09	0.083	0.083	0.089
aM2 includes year and genotype (no SNP information); M3: extends M2 with the addition of genotype-by-year interaction; M5 includes year, first 5 marker-derived PCs, additive effect of SNPs and genotype-by-year interaction; M6 expands M5 by adding the effects of dominance; M7 includes year, 5-PCs, genotype-by-year interactions and SNPs with dominance modeled using up to 4 degrees of freedom per lo…
